# Supplementary material for: A robust and porous titanium metal–organic framework for gas adsorption, CO2capture and conversion
Source: Royal Society of Chemistry journal article supplement (doi:10.1039/d2dt03158b), 2023-01-01
Supplement: d2dt03158b1.pdf [file d2dt03158b1.pdf]

## Electronic Supporting Information

### A robust and porous titanium metal-organic framework for gas adsorption, CO<sub>2</sub> capture and conversion

Kuze Pan,<sup>a</sup> Xuezheng Si,<sup>a</sup> Xiaoying zhang,<sup>a</sup> Qingxia Yao,<sup>\*a</sup> Yunwu Li,<sup>a</sup> Wenzeng Duan,<sup>a</sup> Yi Qiu,<sup>\*b</sup> Jie Su,<sup>b</sup> Xianqiang Huang<sup>\*a</sup>

*a. School of Chemistry and Chemical Engineering, and Shandong Provincial Key Laboratory/Collaborative Innovation Center of Chemical Energy Storage and Novel Cell Technology, Liaocheng University, Liaocheng 252000, China. E-mail: yaoqxlcu@163.com; hxqqxh2008@163.com*

*b. College of Chemistry and molecular engineering, Peking University, Beijing, 100871, PR China. E-mail: qiuyi@pku.edu.cn*

### S1 Materials and Instruments

All chemicals were commercially available and used without further purification. IR spectra were recorded on a Nicolet-iS50 FT-IR spectrophotometer with KBr pellets in the region of 4000-400 cm<sup>-1</sup>. The powder X-ray diffraction (PXRD) data were collected on a Rigaku SmartLab 9 kW Advance diffractionmeter with Cu-K $\alpha$  radiation ( $\lambda=1.5418$  Å) at 298 K. Thermogravimetric analysis (TGA) and mass spectrum was performed under nitrogen atmosphere on a Netzsch STA 449F5-QMS403C simultaneous TG/DSC-QMS analyzer with a heating rate of 20 °C/min. N<sub>2</sub> and CO<sub>2</sub> adsorption isotherms were measured on a Micromeritics ASAP 2460 system. The sample were degassed at 150 °C for 12 h prior to the measurements. <sup>1</sup>H and <sup>13</sup>C NMR spectra were measured on Bruker 500 MHz spectrometer by using tetramethylsilane (TMS) as the internal standard. SEM-Energy-dispersive X-Ray analysis (EDX) Particle morphologies and dimensions were studied with a Thermo Fisher Scientific FIB-SEM GX4 scanning electron microscope at an accelerating voltage of 20 kV.

**Table S1** The reported Ti-MOFs with various Ti-O clusters

| Entry | Metalcluster/core                               | Materials             | Surface area                                           | Ref  |
|-------|-------------------------------------------------|-----------------------|--------------------------------------------------------|------|
| 1     | TiO <sub>6</sub>                                | ZTOF-2                | S <sub>BET</sub> = 1878 m <sup>2</sup> g <sup>-1</sup> | [1]  |
| 2     | TiO <sub>6</sub>                                | NTU-9                 |                                                        | [2]  |
| 3     | TiO <sub>6</sub>                                | MIL-167               |                                                        | [3]  |
| 4     | TiO <sub>6</sub>                                | MIL-168               |                                                        | [3]  |
| 5     | TiO <sub>6</sub>                                | 1-Ti                  |                                                        | [4]  |
| 6     | TiO <sub>6</sub>                                | MUV-11                | S <sub>BET</sub> = 756 m <sup>2</sup> g <sup>-1</sup>  | [5]  |
| 7     | TiO <sub>4</sub> ( $\mu_2$ -O) <sub>2</sub>     | ACM-1                 | S <sub>BET</sub> = 1212 m <sup>2</sup> g <sup>-1</sup> | [6]  |
| 8     | TiO <sub>6</sub> ( $\mu_2$ -O)                  | COK-47                | S <sub>BET</sub> = 573 m <sup>2</sup> g <sup>-1</sup>  | [7]  |
| 9     | TiO <sub>6</sub> ( $\mu_2$ -O)                  | COK-47-bdc            |                                                        | [7]  |
| 10    | TiO <sub>6</sub> ( $\mu_2$ -O)                  | COK-47-bpyrdc         |                                                        | [7]  |
| 11    | Ti(C <sub>2</sub> O <sub>2</sub> ) <sub>3</sub> | Ti-CAT-5              | S <sub>BET</sub> = 450 m <sup>2</sup> g <sup>-1</sup>  | [8]  |
| 12    | Ti <sub>2</sub> O <sub>11</sub>                 | MIL-169               |                                                        | [3]  |
| 13    | Ti <sub>3</sub> O                               | Ti-MIL-101            |                                                        | [9]  |
| 14    | Ti <sub>3</sub> (OH) <sub>2</sub>               | Ti <sub>3</sub> -BPDC | S <sub>BET</sub> = 636 m <sup>2</sup> g <sup>-1</sup>  | [10] |

|    |                                                                                                                                                      |                             |                                                          |           |
|----|------------------------------------------------------------------------------------------------------------------------------------------------------|-----------------------------|----------------------------------------------------------|-----------|
| 15 | Ti <sub>3</sub> (μ <sub>3</sub> -O)                                                                                                                  | COK-69                      | S <sub>BET</sub> = 29.13 m <sup>2</sup> g <sup>-1</sup>  | [11]      |
| 16 | Ti <sub>3</sub> (μ <sub>3</sub> -O)                                                                                                                  | MIL-100(Ti)                 | S <sub>BET</sub> = 1321 m <sup>2</sup> g <sup>-1</sup>   | [12]      |
| 17 | Co <sub>2</sub> Ti(μ <sub>3</sub> -O)                                                                                                                | CTOF-1                      | S <sub>BET</sub> = 637 m <sup>2</sup> g <sup>-1</sup>    | [13]      |
| 18 | Co <sub>2</sub> Ti(μ <sub>3</sub> -O)                                                                                                                | CTOF-2                      | S <sub>BET</sub> = 618 m <sup>2</sup> g <sup>-1</sup>    | [13]      |
| 19 | Co <sub>2</sub> Ti(μ <sub>3</sub> -O) (COO) <sub>6</sub>                                                                                             | PFC-20-Co <sub>2</sub> Ti   |                                                          | [14]      |
| 20 | Ni <sub>2</sub> Ti(μ <sub>3</sub> -O) (COO) <sub>6</sub>                                                                                             | PFC-20-Ni <sub>2</sub> Ti   |                                                          | [14]      |
| 21 | Mn <sub>2</sub> Ti(μ <sub>3</sub> -O) (COO) <sub>6</sub>                                                                                             | PFC-20-Mn <sub>2</sub> Ti   |                                                          | [14]      |
| 22 | Co <sub>2</sub> Ti(μ <sub>3</sub> -O)                                                                                                                | Co <sub>2</sub> Ti-bdc-tpt  | S <sub>BET</sub> = 1369.8 m <sup>2</sup> g <sup>-1</sup> | [15]      |
| 23 | Mg <sub>2</sub> Ti(μ <sub>3</sub> -O)                                                                                                                | Mg <sub>2</sub> Ti-bdc-tpt  | S <sub>BET</sub> = 1460.6 m <sup>2</sup> g <sup>-1</sup> | [15]      |
| 24 | Mg <sub>2</sub> Ti(μ <sub>3</sub> -O)                                                                                                                | Mg <sub>2</sub> Ti-bdc-tpy  | S <sub>BET</sub> = 1599.1 m <sup>2</sup> g <sup>-1</sup> | [15]      |
| 25 | Mg <sub>2</sub> Ti(μ <sub>3</sub> -O)                                                                                                                | Mg <sub>2</sub> Ti-bdc-tpbz | S <sub>BET</sub> = 1661.7 m <sup>2</sup> g <sup>-1</sup> | [15]      |
| 26 | Zn <sub>3</sub> Ti(μ <sub>3</sub> -OH)                                                                                                               | ZTOF-1                      | S <sub>BET</sub> = 1045 m <sup>2</sup> g <sup>-1</sup>   | [16]      |
| 27 | Ti <sub>2</sub> Ca <sub>2</sub> (μ <sub>3</sub> -O) <sub>2</sub> (H <sub>2</sub> O) <sub>4</sub>                                                     | MUV-10                      | S <sub>BET</sub> = 1041 m <sup>2</sup> g <sup>-1</sup>   | [17]      |
| 28 | Ti <sub>2</sub> Ca <sub>2</sub> (μ <sub>3</sub> -O) <sub>2</sub> (μ <sub>2</sub> -<br>H <sub>2</sub> O) <sub>2</sub> (H <sub>2</sub> O) <sub>4</sub> | LCU-402                     | S <sub>BET</sub> = 1460 m <sup>2</sup> g <sup>-1</sup>   | This work |
| 29 | [Ti <sub>5</sub> (OAc) <sub>2</sub> (OH) <sub>6</sub> ] <sub>n</sub>                                                                                 | Ti-TBP                      | S <sub>BET</sub> = 527.7 m <sup>2</sup> g <sup>-1</sup>  | [18]      |
| 30 | (Ti <sub>6</sub> O <sub>9</sub> ) <sub>n</sub>                                                                                                       | MIL-177-HT                  | S <sub>BET</sub> = 690 m <sup>2</sup> g <sup>-1</sup>    | [19]      |
| 31 | Ti <sub>6</sub> (μ <sub>3</sub> -O) <sub>6</sub> (μ <sub>3</sub> -OH) <sub>6</sub>                                                                   | ZSTU-1                      | S <sub>BET</sub> = 536 m <sup>2</sup> g <sup>-1</sup>    | [20]      |
| 32 | Ti <sub>6</sub> (μ <sub>3</sub> -O) <sub>6</sub> (μ <sub>3</sub> -OH) <sub>6</sub>                                                                   | ZSTU-2                      | S <sub>BET</sub> = 628 m <sup>2</sup> g <sup>-1</sup>    | [20]      |
| 33 | Ti <sub>6</sub> (μ <sub>3</sub> -O) <sub>6</sub> (μ <sub>3</sub> -OH) <sub>6</sub>                                                                   | ZSTU-3                      | S <sub>BET</sub> = 861 m <sup>2</sup> g <sup>-1</sup>    | [20]      |
| 34 | Ti <sub>6</sub> O <sub>6</sub>                                                                                                                       | MOF-901                     | S <sub>BET</sub> = 550 m <sup>2</sup> g <sup>-1</sup>    | [21]      |
| 35 | Ti <sub>6</sub> O <sub>6</sub>                                                                                                                       | MOF-902                     | S <sub>BET</sub> = 400 m <sup>2</sup> g <sup>-1</sup>    | [22]      |
| 36 | Ti <sub>7</sub> O <sub>6</sub>                                                                                                                       | PCN-22                      | S <sub>BET</sub> = 1284 m <sup>2</sup> g <sup>-1</sup>   | [23]      |
| 37 | Ti <sub>8</sub> O <sub>8</sub> (OH) <sub>4</sub>                                                                                                     | MIL-125                     | S <sub>BET</sub> = 1550 m <sup>2</sup> g <sup>-1</sup>   | [24]      |
| 38 | Ti <sub>8</sub> O <sub>8</sub> (OH) <sub>4</sub>                                                                                                     | NH <sub>2</sub> -MIL-125    | S <sub>BET</sub> = 1302 m <sup>2</sup> g <sup>-1</sup>   | [25]      |
| 39 | Ti <sub>8</sub> (μ <sub>2</sub> -O) <sub>8</sub> (OAc) <sub>8</sub>                                                                                  | MIP-207                     | S <sub>BET</sub> = 570 m <sup>2</sup> g <sup>-1</sup>    | [26]      |
| 40 | Ti <sub>8</sub> Zr <sub>2</sub> O <sub>12</sub>                                                                                                      | PCN-415                     | S <sub>BET</sub> = 1550 m <sup>2</sup> g <sup>-1</sup>   | [27]      |
| 41 | Ti <sub>8</sub> Zr <sub>2</sub> O <sub>12</sub>                                                                                                      | PCN-416                     | S <sub>BET</sub> = 1337 m <sup>2</sup> g <sup>-1</sup>   | [27]      |
| 42 | Ti <sub>12</sub> O <sub>15</sub>                                                                                                                     | MIL-177-LT                  | S <sub>BET</sub> = 730 m <sup>2</sup> g <sup>-1</sup>    | [19]      |
| 43 | Ti <sub>n</sub> (μ <sub>2</sub> -O) <sub>n</sub>                                                                                                     | DGIST-1                     | S <sub>BET</sub> = 1957.3 m <sup>2</sup> g <sup>-1</sup> | [28]      |

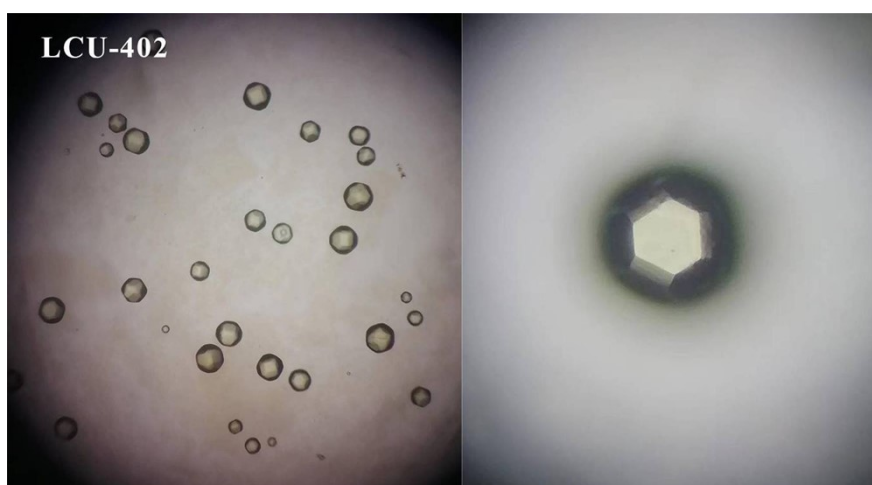

**Fig. S1** Photographs of single crystals of LCU-402

## S2 Scanning Electron Microscopy (SEM-EDX)

Particle morphologies, dimensions, and SEM-Energy-dispersive X-Ray analysis (EDX) of LCU-402 solids were studied with a Thermo Fisher Scientific FIB-SEM GX4 scanning electron microscope at an accelerating voltage of 20 kV. Mapping of LCU-402 showing Ti (roseo) and Ca (yellow) confirms that element distribution is homogeneous.

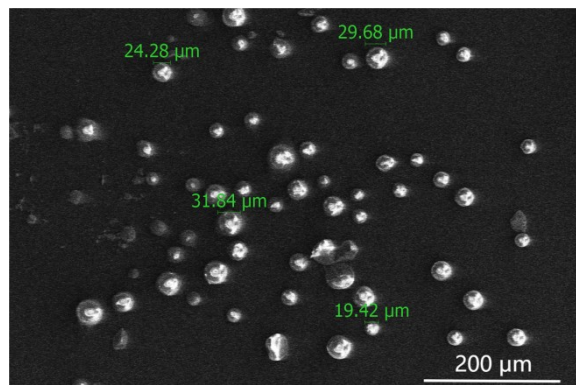

**Fig. S2** Scanning Electron Microscopy (SEM) images of LCU-402.

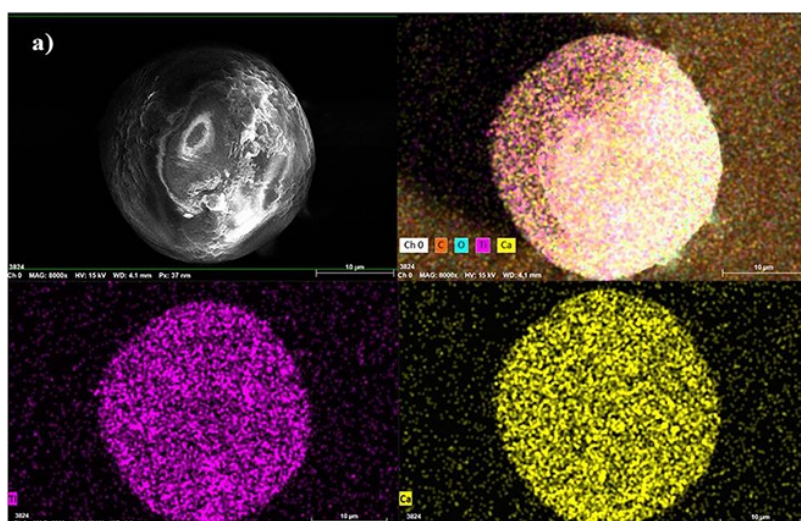

**Fig. S3** Mapping of LCU-402 showing Ti (pink) and Ca (yellow)

### S3 Single-crystal X-ray diffraction analysis of LCU-402

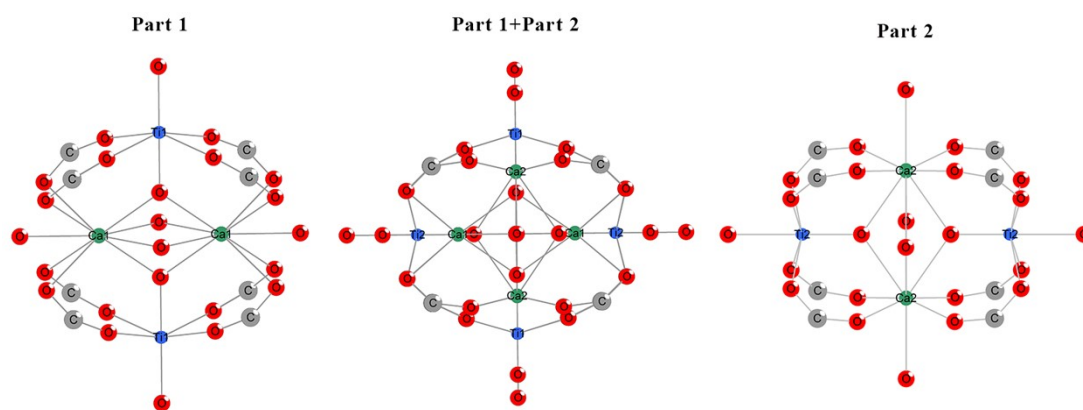

**Fig. S4** ORTEP representation (50% probability) of the secondary building unit showing the two fragments PART 1 and PART 2 separately.

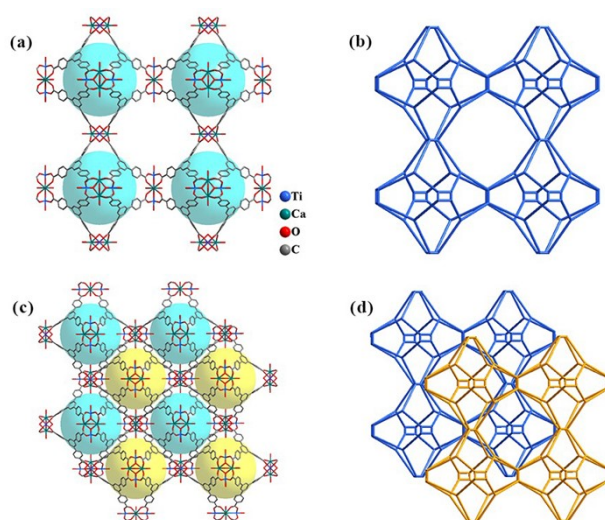

**Fig. S5** 8-c SBU links 3-c BTB and (3,8)-connected augmented the net.

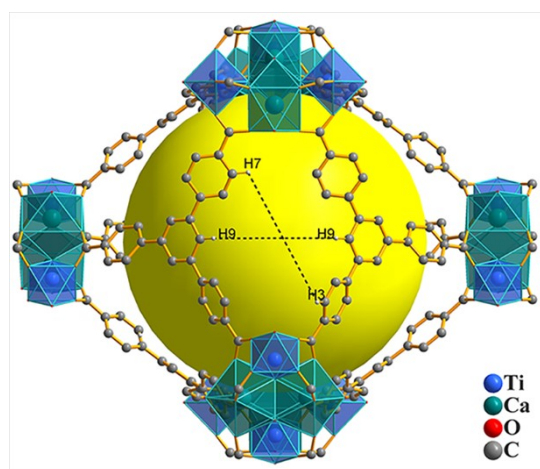

**Fig. S6** the distance of H9...H9 and H3...H7

### Table S2 Crystal data and structure refinements for LCU-402

|                                                       |                                                                     |
|-------------------------------------------------------|---------------------------------------------------------------------|
|                                                       | BTB-Ti-Ca                                                           |
| Empirical formula                                     | $C_{36}H_{25.31}CaO_{11.65}Ti$                                      |
| Formula weight                                        | 732.32                                                              |
| Crystal system                                        | cubic                                                               |
| Space group                                           | <i>Im-3</i>                                                         |
| <i>a</i> /Å                                           | 26.4097(2)                                                          |
| <i>b</i> /Å                                           | 26.4097(2)                                                          |
| <i>c</i> /Å                                           | 26.4097(2)                                                          |
| $\alpha$ /°                                           | 90                                                                  |
| $\beta$ /°                                            | 90                                                                  |
| $\gamma$ /°                                           | 90                                                                  |
| Volume/Å <sup>3</sup>                                 | 18420.0(4)                                                          |
| <i>Z</i>                                              | 12                                                                  |
| $\rho_{calc}$ /g/cm <sup>3</sup>                      | 0.792                                                               |
| $\mu$ /mm <sup>-1</sup>                               | 2.215                                                               |
| F(000)                                                | 4518.0                                                              |
| 2 $\theta$ range for data collection/°                | 6.694 to 144.74                                                     |
| Index ranges                                          | -24 ≤ <i>h</i> ≤ 31,<br>-31 ≤ <i>k</i> ≤ 29,<br>-32 ≤ <i>l</i> ≤ 32 |
| GoF on F <sup>2</sup>                                 | 1.045                                                               |
| Final R indexes [ <i>I</i> ≥ 2 $\sigma$ ( <i>I</i> )] | R1 = 0.0701,<br>wR2 = 0.2013                                        |
| Final R indexes [all data]                            | R1 = 0.0909,<br>wR2 = 0.2218                                        |

#### S4 Thermogravimetric analysis

Thermogravimetric analysis (TGA) was performed under nitrogen atmosphere on a Netzsch STA 449F5-QMS403C. TGA plot (black line) shows the LCU-402 loses all solvents (water, DMF) with a weight loss of 34.9% before 250 °C. Then, with clear plateau, it started to decompose.

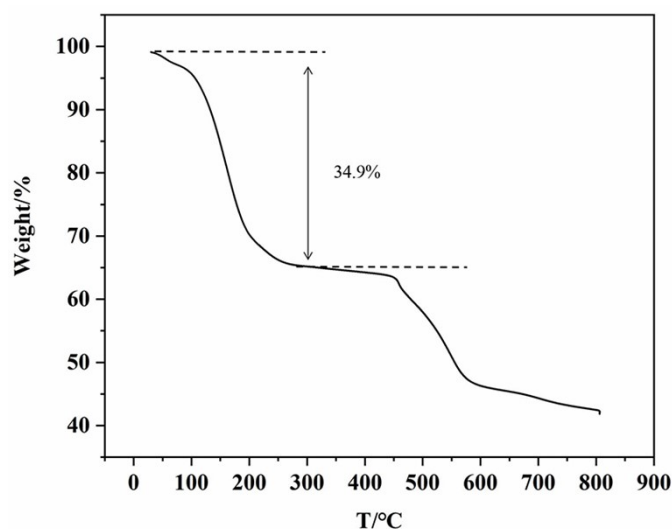

Fig. S7 TGA plot of as-synthesized LCU-402

#### S5 LCU-402 Pore size distribution

N<sub>2</sub> and CO<sub>2</sub> adsorption isotherms were measured on a Micromeritics ASAP 2460 system. The sample were degassed at 150 °C for 12 h prior to the measurements. Pore size distribution was analysed by using the solid density functional theory (NLDFT) for the adsorption branch assuming a cylindrical pore model.

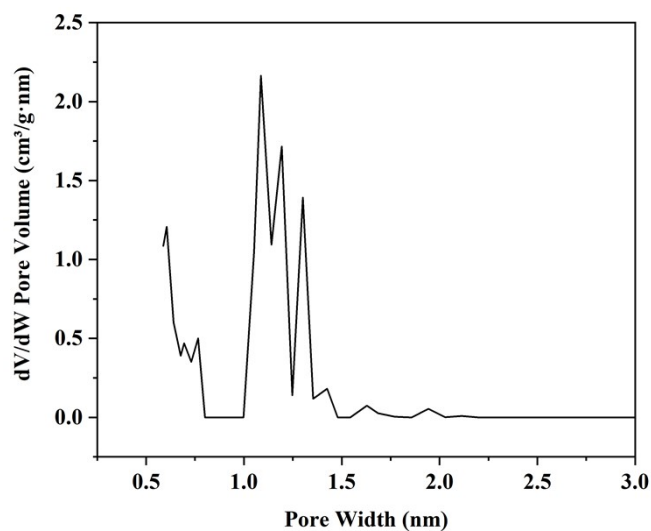

Fig. S8 LCU-402 Pore Size Distribution

#### S6 Isothermic heat of CO<sub>2</sub> adsorption (Q<sub>st</sub>)

The adsorption heat ( $Q_{st}$ ) of hydrogen for the desolvated LCU-402 is fitted by Virial method using the data obtained from 273 K and 298 K with the following Equation:

$$\ln(P) = \ln(N) + \frac{1}{T} \sum_{i=0}^m a_i * N_i + \frac{1}{T} \sum_{j=0}^m a_j * N_j$$

N: adsorbed quantity (mg/g);

P: pressure (mmHg);

T: temperature (K);

$a_i, b_j$ : constant;

R:  $8.314 \text{ J} \cdot \text{mol}^{-1} \cdot \text{K}^{-1}$ ;

The isosteric enthalpy of adsorption ( $Q_{st}$ ):

$$Q_{st} = \ln(P) = -R * \sum_{i=0}^m a_i * N_i$$

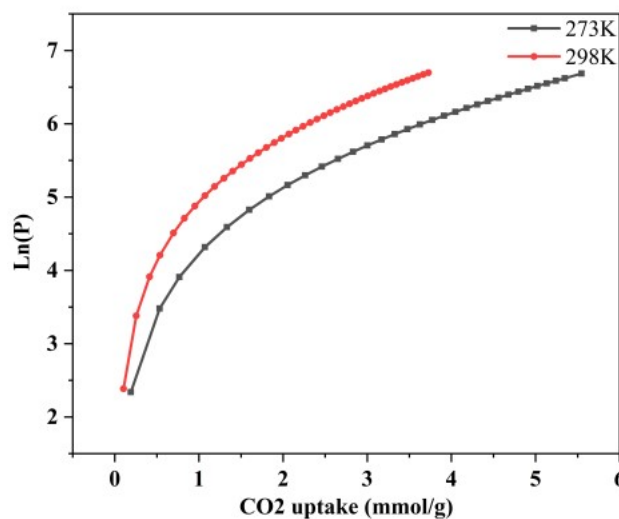

**Fig. S9** Nonlinear curve fitting of  $\text{CO}_2$  sorption isotherms for LCU-402 at 273 K and 298 K.

**Table S3** Fit curve equation and factor.

|      |         | Value       | Standard Error |
|------|---------|-------------|----------------|
| 273K | $a_0^*$ | -2360.88925 | 11.35166       |
|      | $a_1^*$ | 99.60839    | 12.11314       |
|      | $a_2^*$ | -44.62595   | 3.84775        |
|      | $a_3^*$ | 16.47407    | 1.47966        |
|      | $a_4^*$ | -2.68098    | 0.29351        |
|      | $a_5^*$ | 0.16618     | 0.02099        |
|      | $b_0^*$ | 12.56056    | 0.03924        |
|      | $b_1^*$ | 0.08971     | 0.04187        |
|      | $b_2^*$ | -0.02043    | 0.00978        |
|      | $k$     | 273         | 0              |
|      | $a_0^*$ | -2360.88925 | 11.35166       |
|      | $a_1^*$ | 99.60839    | 12.11314       |

|      |     |           |         |
|------|-----|-----------|---------|
| 298K | a2* | -44.62595 | 3.84775 |
|      | a3* | 16.47407  | 1.47966 |
|      | a4* | -2.68098  | 0.29351 |
|      | a5* | 0.16618   | 0.02099 |
|      | b0* | 12.56056  | 0.03924 |
|      | b1* | 0.08971   | 0.04187 |
|      | b2* | -0.02043  | 0.00978 |
|      | k   | 298       | 0       |

$$y = \ln(x) + 1/k * (a0 + a1 * x + a2 * x^2 + a3 * x^3 + a4 * x^4 + a5 * x^5) + (b0 + b1 * x + b2 * x^2)$$

Isosteric heat of CO<sub>2</sub> adsorption (Q<sub>st</sub>) was calculated by using the virial equation based on the isotherms at 273 K and 298 K.

### S6 Isosteric heat of CO<sub>2</sub> adsorption (Q<sub>st</sub>)

Isosteric heat of CO<sub>2</sub> adsorption (Q<sub>st</sub>) was calculated by using the virial equation based on the isotherms at 273 K and 298 K.

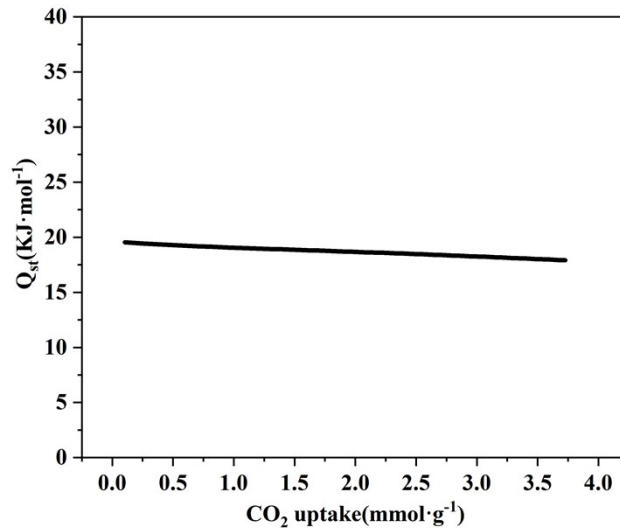

**Fig. S10** Isosteric heat of adsorption (Q<sub>st</sub>) calculated by the virial method

### S7 IAST selectivity of LCU-402 for C<sub>2</sub>H<sub>6</sub>/C<sub>2</sub>H<sub>4</sub> mixtures.

For adsorption isotherm data measured at 298 K, it was performed using the single point Langmuir-Freundlich isotherm model shown in Equation

$$q = q_{sat} \frac{bp^v}{1 + bp^v}$$

q: Adsorption quantity mmol/g

q<sub>sat</sub>: The saturated adsorption amount of the site mmol/g



b: Single-point Langmuir-Freundlich constant of a gas component at the adsorption site kPa

V: Single-point Langmuir-Freundlich isotherm index

P: Separation pressure of the gas components kPa

**Table S4 Fit curve equation and factor.**

|                               |    | Value    | Standard Error |
|-------------------------------|----|----------|----------------|
| C <sub>2</sub> H <sub>4</sub> | A1 | 8.62414  | 0.11905        |
|                               | B1 | 0.01887  | 2.65735E-4     |
|                               | C1 | 0.94081  | 0.00909        |
| C <sub>2</sub> H <sub>6</sub> | A1 | 10.13142 | 0.21346        |
|                               | B1 | 0.02708  | 5.10528E-4     |
|                               | C1 | 0.86876  | 0.01333        |

Based on the fitting parameters of the single-point Langmuir-Freundlich isotherm model at 298 K, the selectivity of LCU-402 to the C<sub>2</sub>H<sub>6</sub> and C<sub>2</sub>H<sub>4</sub> components was calculated using the ideal solution adsorption theory (IAST).

$$S_{ads} = \frac{q_1 / q_2}{y_1 / y_2}$$

$S_{ads}$  : selectivity

q: adsorption quantity

y: molar fraction in the mixture gas

### S7 Fourier-Transform infrared spectrum

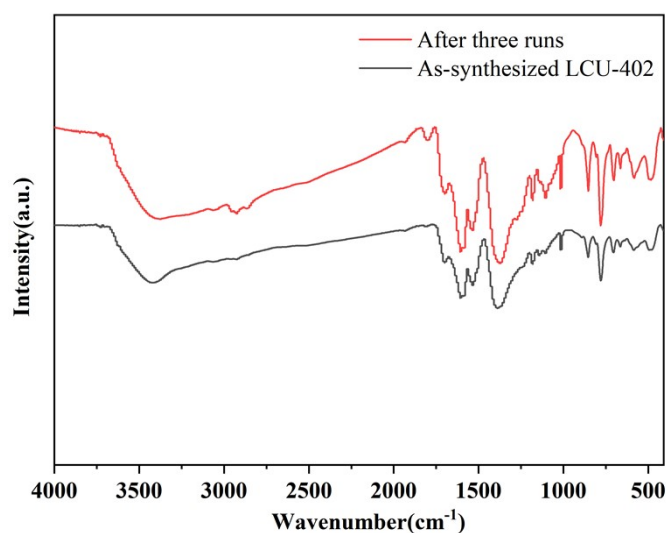

**Fig. S11** The FT-IR spectrum of LCU-402 as-synthesized and after three catalytic runs.

### S8 Cycloaddition reaction of CO<sub>2</sub> with epoxides

Details of experiments and calculation procedures of catalytic efficiency:

In a typical catalytic reaction under 1 bar, epoxide (4 mmol), TBAB (1 mmol, 5 mol%), LCU-402 (0.5 mol% for open Ti sites) were put into a 15 mL Schlenk tube with solvent free environment. After centrifuging to recycle the catalyst, a little supernatant reaction mixture was taken to get analyzed by  $^1\text{H}$  NMR.

The yields of propylene oxide, epichlorohydrin, epibromohydrin, 1,2-epoxyoctane, and allyl glycidyl ether ( $\text{H}_a$  for epoxides and  $\text{H}_{a'}$  for carbonates, respectively) catalyzed by the LCU-402 were calculated according to the following equation.

$$\text{Yield}(\%) = \frac{I_{\text{H}_{a'}}}{I_{\text{H}_a} + I_{\text{H}_{a'}}} \times 100\%$$

The yield of styrene oxide to styrene carbonate were determined by calculation of the  $^1\text{H}$  NMR integrals of corresponding highlighted protons in styrene oxide ( $\text{H}_a$ ), styrene carbonate ( $\text{H}_{a'}$ ) and phenyl group ( $\text{H}_b$ - $\text{H}_f$ ) (from styrene oxide, styrene carbonate and other by-products) according to the following equation.

$$\text{Yield}(\%) = \frac{5 \times I_{\text{H}_{a'}}}{I_{\text{H}_b} - \text{H}_f} \times 100\%$$

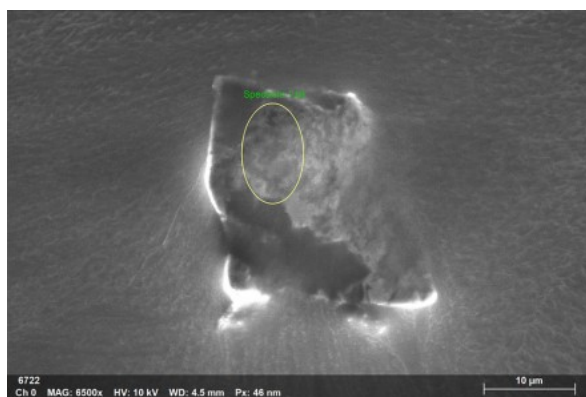

**Figure S12.** Image of the region on which EDX analysis was taken; elements ratio % from EDX analysis for organic part is represented in the table below.

**Table S5** The element content determined by EDX analysis.

| Element | Atomic number | Normalized mass % | Atom % | Abs.error % |
|---------|---------------|-------------------|--------|-------------|
| O       | 8             | 40.82             | 52.43  | 6.06        |
| Si      | 14            | 32.96             | 24.12  | 1.39        |
| K       | 19            | 10.74             | 5.65   | 0.48        |
| Al      | 13            | 8.47              | 6.45   | 0.44        |
| C       | 6             | 7.01              | 11.35  | 1.85        |
| Ti      | 22            | 0.00              | 0.00   | 0.02        |
| Ca      | 20            | 0.00              | 0.00   | 0.00        |

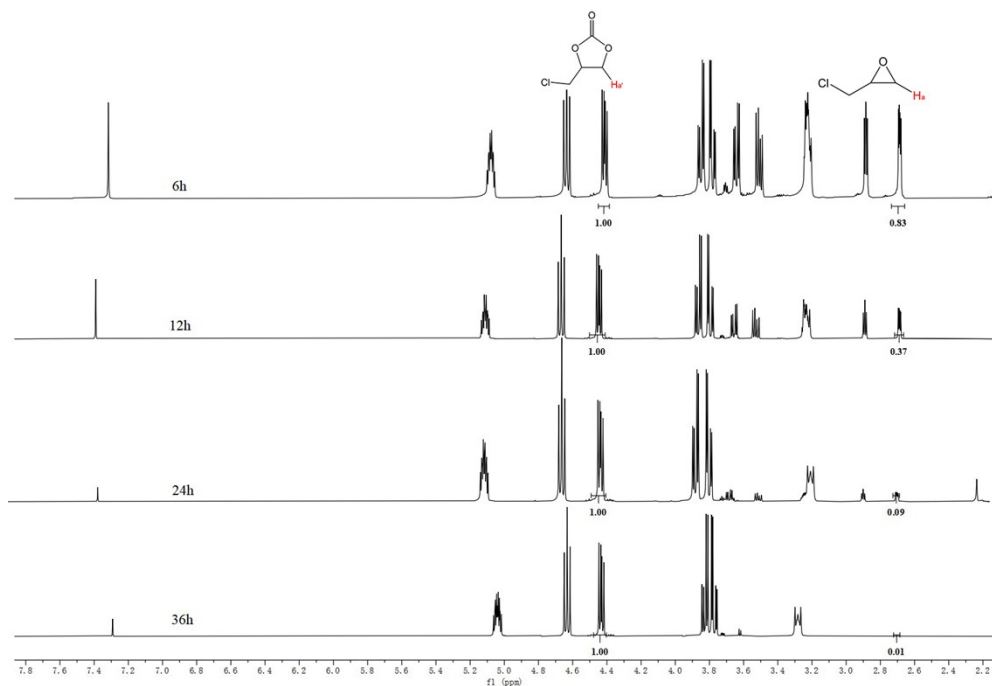

**Fig. S13**  $^1\text{H}$  NMR spectrum of the mixture products under  $0.15\text{atm CO}_2$  atmosphere catalyzed by LCU-402 in  $\text{CDCl}_3$ .

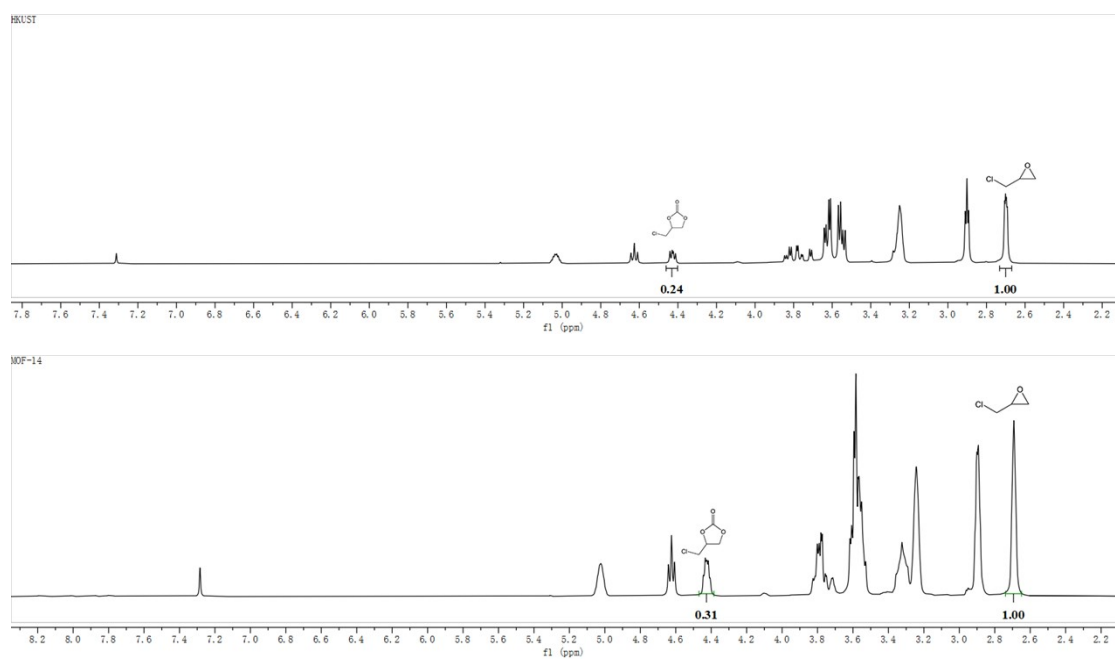

**Fig. S14**  $^1\text{H}$  NMR spectrum of the mixture products under 0.15atm  $\text{CO}_2$  atmosphere catalyzed by HKUST-1 and MOF-14 in  $\text{CDCl}_3$ .

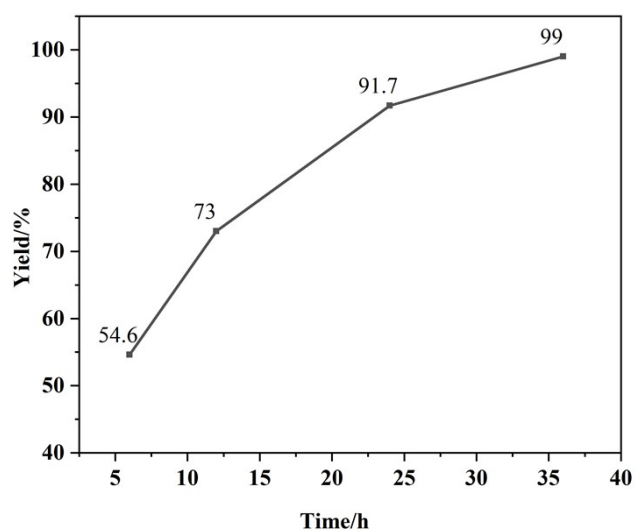

**Fig. S15** Continuous sampling experiment of LCU-402 for cycloaddition reaction of epichlorohydrin with 0.15atm  $\text{CO}_2$ .

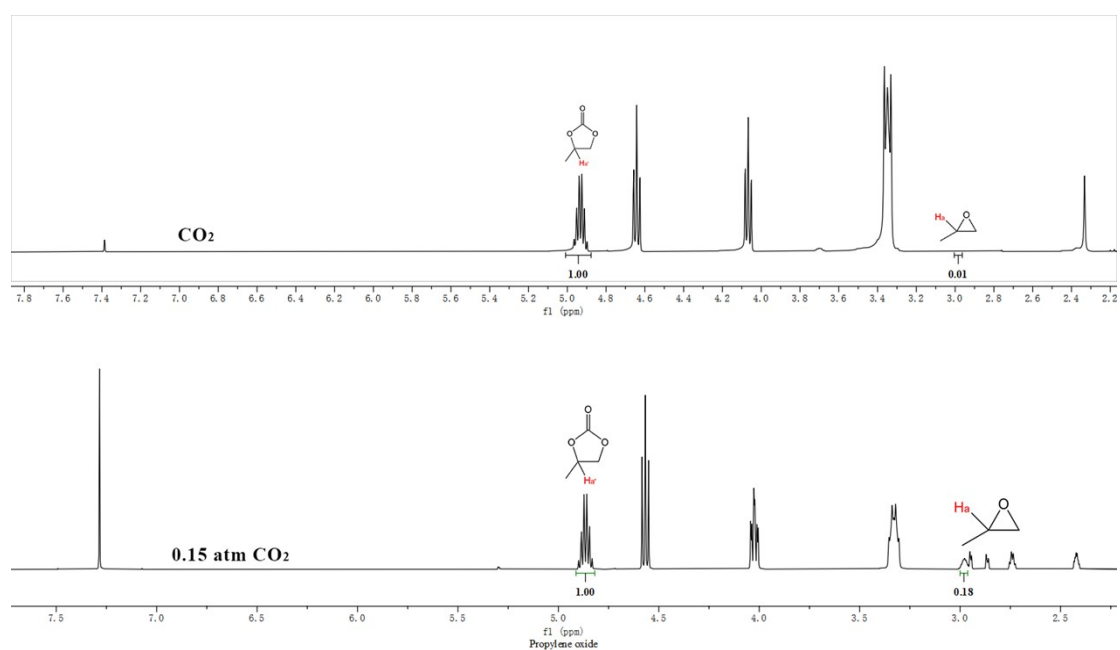

**Fig. S16**  $^1\text{H}$  NMR spectrum for the cycloaddition reaction of propylene epoxide under  $\text{CO}_2$  and 0.15atm  $\text{CO}_2$  atmosphere catalyzed by LCU-402.

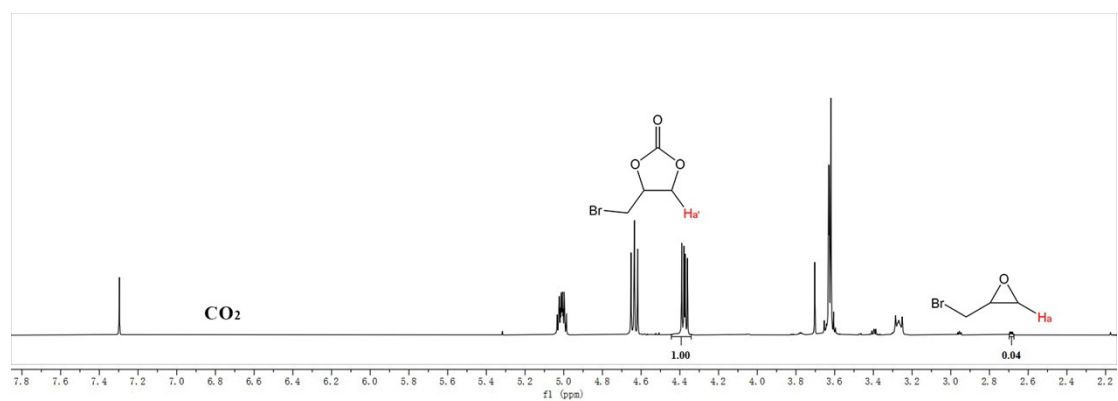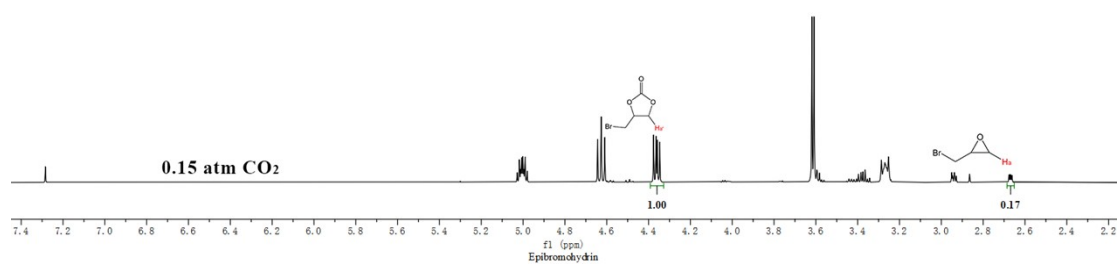

**Fig. S17** <sup>1</sup>H NMR spectrum for the cycloaddition reaction of epoxy bromine propane under CO<sub>2</sub> and 0.15atm CO<sub>2</sub> atmosphere catalyzed by LCU-402.

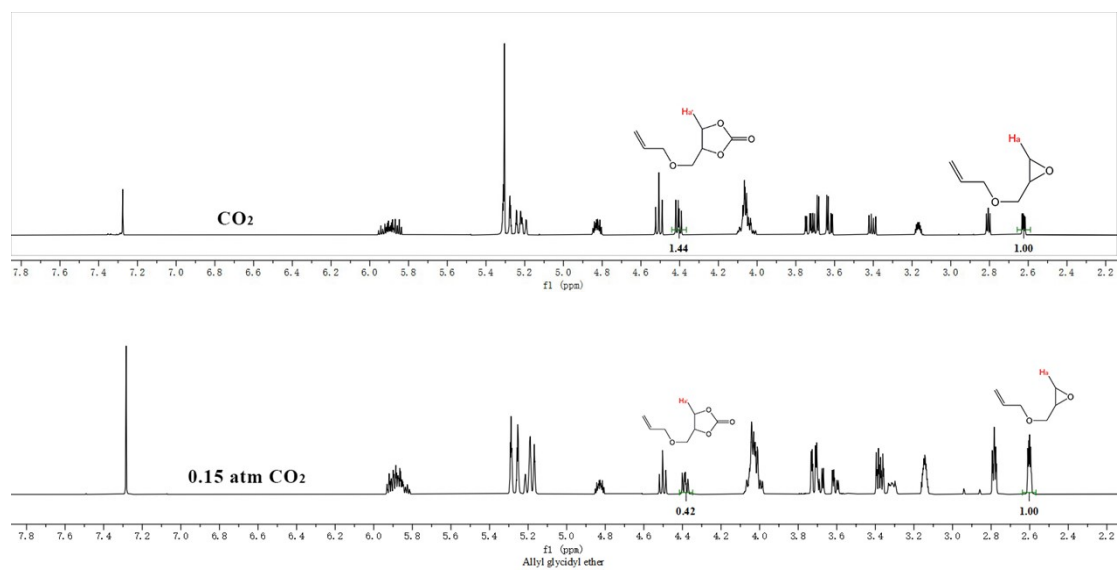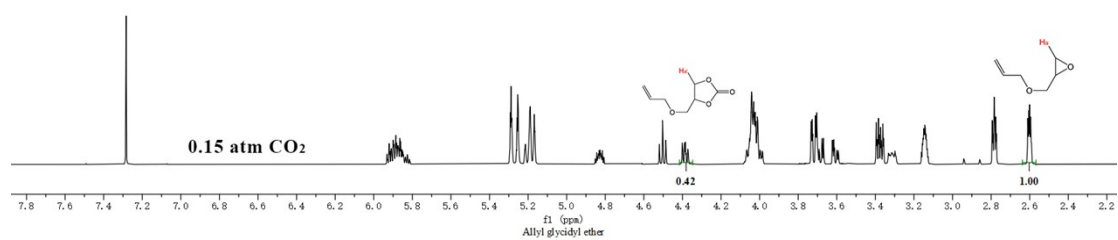

**Fig. S18** <sup>1</sup>H NMR spectrum for the cycloaddition reaction of allyl glycidyl ether under CO<sub>2</sub> and 0.15 atm CO<sub>2</sub> atmosphere catalyzed by LCU-402.

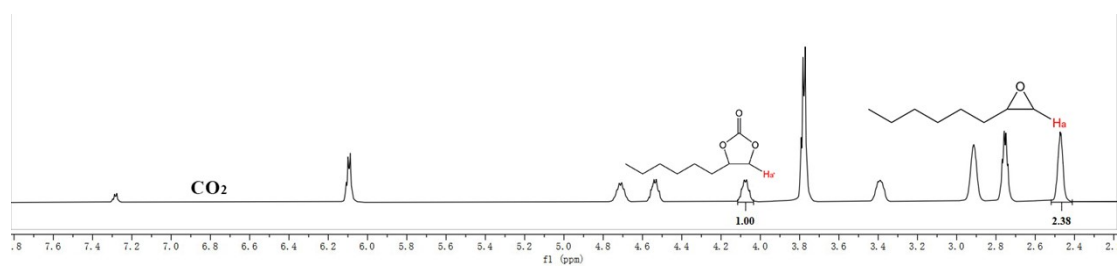

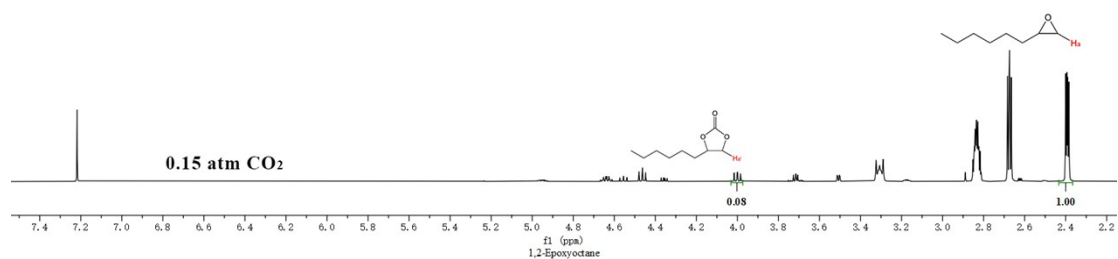

**Fig. S19** <sup>1</sup>H NMR spectrum for the cycloaddition reaction of cycloxygen octane under CO<sub>2</sub> and 0.15 atm CO<sub>2</sub> atmosphere catalyzed by LCU-402.

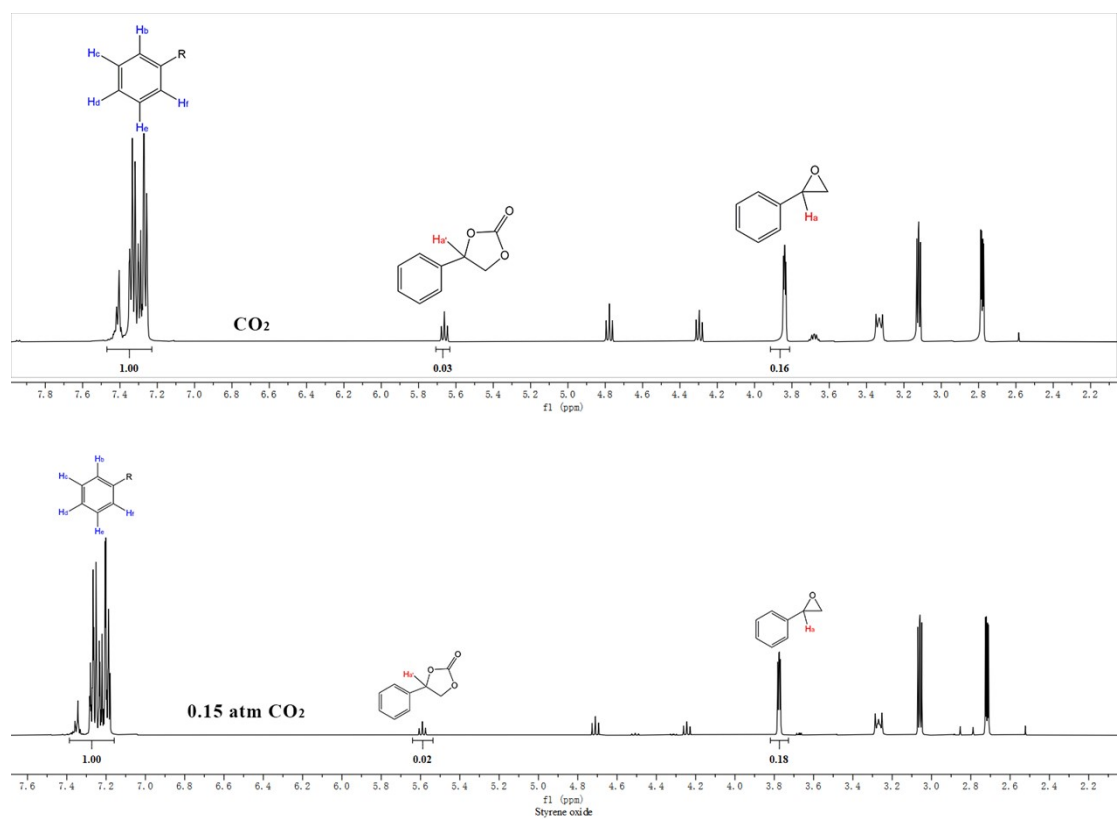

**Fig. S20** <sup>1</sup>H NMR spectrum for the cycloaddition reaction of styrene oxide under CO<sub>2</sub> and 0.15 atm CO<sub>2</sub> atmosphere catalyzed by LCU-402.

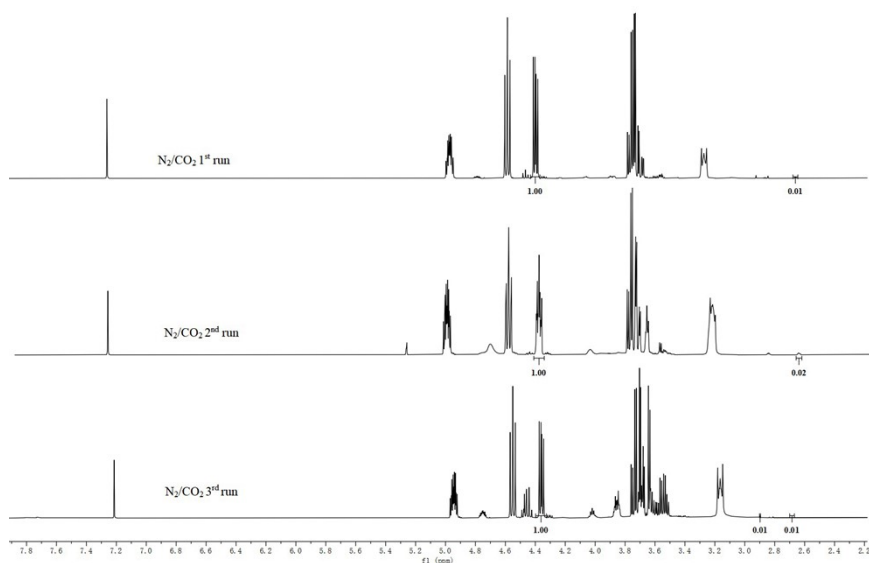

**Fig. S21**  $^1\text{H}$  NMR spectrum of the mixture products under 0.15atm  $\text{CO}_2$  atmosphere catalyzed by LCU-402 in  $\text{CDCl}_3$ .

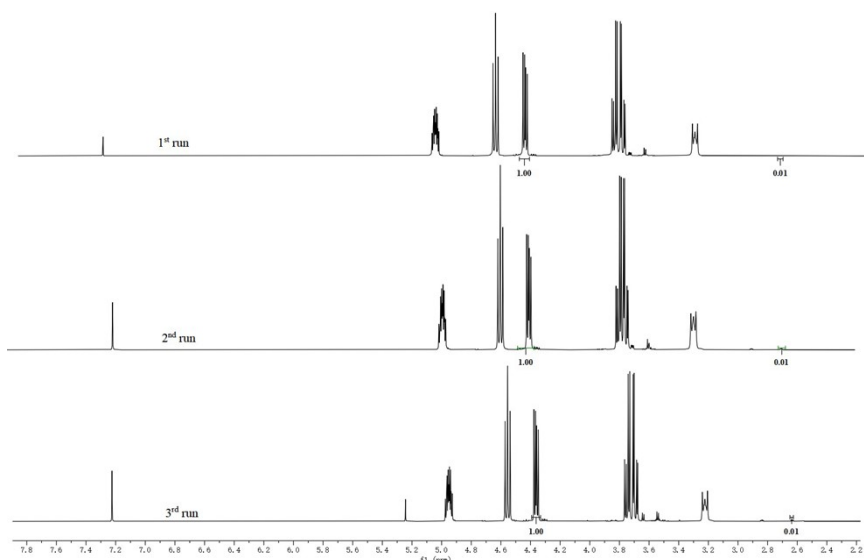

**Fig. S22**  $^1\text{H}$  NMR spectrum of the mixture products under  $\text{CO}_2$  atmosphere catalyzed by LCU-402 in  $\text{CDCl}_3$ .

## References

- [1] K. Hong, H. Chun, Unprecedented and highly symmetric (6,8)-connected topology in a porous metal-organic framework through a Zn-Ti heterometallic approach. *Chem. Commun.*, **2013**, 49, 10953
- [2] J. Gao, J. Miao, P.-Z. Li, W. Y. Teng, L. Yang, Y. Zhao, B. Liu, Q. Zhang, A p-type Ti(IV)-based metal-organic framework with visible-light photo-response. *Chem. Commun.*, **2014**, 50, 3786-3788.
- [3] H. Assi, L. C. P. Pérez, G. Mouchaham, F. Ragon, M. Nasalevich, N. Guillou, C. Martineau, H. Chevreau, F. Kapteijn, J. Gascon, P. Fertey, E. Elkaim, C. Serre, T. Devic, Investigating the case of titanium (IV) carboxyphenolate photoactive coordination polymers. *Inorg. Chem.*, **2016**, 55, 7192

- [4] M. E. Ziebel, L. E. Darago, J. R. Long, Control of electronic structure and conductivity in two-dimensional metal-semiquinoid frameworks of titanium, vanadium, and chromium. *J. Am. Chem. Soc.*, **2018**, 140, 3040
- [5] N. M. Padial, J. Castells-Gil, N. Almora-Barrios, M. Romero-Angel, I. d. Silva, M. Barawi, A. García-Sánchez, V. A. d. I. P. O'Shea, C. Martí-Gastaldo, Hydroxamate titanium-organic frameworks and the effect of siderophore-type linkers over their photocatalytic activity. *J. Am. Chem. Soc.*, **2019**, 141, 13124-13133.
- [6] A. Cadiou, N. Kolobov, S. Srinivasan, M. G. Goesten, H. Haspel, A. V. Bavykina, M. R. Tchalala, P. Maity, A. Goryachev, A. S. Poryvaev, M. Eddaoudi, M. V. Fedin, O. F. Mohammed, J. Gascon, A titanium metal-organic framework with visible-light-responsive photocatalytic activity. *Angew. Chem. Int. Ed.*, **2020**, 59, 13468-13472.
- [7] S. Smolders, T. Willhammar, A. Krajnc, K. Sentosun, M. T. Wharmby, K. A. Lomachenko, S. Bals, G. Mali, M. B. J. Roeffaers, D. E. D. Vos, B. Bueken, A titanium (IV)-based metal-organic framework featuring defect rich Ti-O sheets as an oxidative desulfurization catalyst. *Angew. Chem. Int. Ed.*, **2019**, 58, 9160-9165.
- [8] N. T. T. Nguyen, H. Furukawa, F. Gandara, C. A. Trickett, H. M. Jeong, K. E. Cordova, O. M. Yaghi, Three-dimensional metal-catecholate frameworks and their ultrahigh proton conductivity. *J. Am. Chem. Soc.*, **2015**, 137, 15394-15397.
- [9] J. A. Mason, L. E. Darago, W. W. Lukens, Jr, J. R. Long, Synthesis and O<sub>2</sub> reactivity of a titanium (III) metal-organic framework. *Inorg. Chem.*, **2015**, 54, 10096-10104.
- [10] X. Feng, Y. Song, J. S. Chen, Z. Li, E. Y. Chen, M. Kaufmann, C. Wang, W. Lin, Cobalt-bridged secondary building units in a titanium metal-organic framework catalyze cascade reduction of N-heteroarenes. *Chem. Sci.*, **2019**, 10, 2193-2198.
- [11] B. Bueken, F. Vermoortele, D. E. P. Vanpoucke, H. Reinsch, C.-C. Tsou, P. Valvekens, T. D. Baerdemaeker, R. Ameloot, C. E. A. Kirschhock, V. V. Speybroeck, J. M. Mayer, D. D. Vos, A flexible photoactive titanium metal-organic framework based on a [TiIV<sub>3</sub>(μ<sub>3</sub>-O)(O)<sub>2</sub>(COO)<sub>6</sub>] Cluster. *Angew. Chem. Int. Ed.*, **2015**, 127, 14118 -14123.
- [12] J. Castells-Gil, N. M. Padial, N. Almora-Barrios, I. d. Silva, D. Mateo, J. Albero, H. García, C. Martí-Gastaldo, De novo synthesis of mesoporous photoactive titanium (IV)-organic frameworks with MIL-100 topology. *Chem. Sci.*, **2019**, 10, 4313-4321.
- [13] K. Hong, W. Bak, D. Moon, H. Chun, Bistable and porous metal-organic frameworks with chargeneutral acs net based on heterometallic M<sub>3</sub>O(CO<sub>2</sub>)<sub>6</sub> building blocks. *Cryst. Growth Des.*, **2013**, 13, 4066-4070.
- [14] L. Li, Z.-B. Fang, W. Deng, J.-D. Yi, R. Wang, T.-F. Liu, Precise construction of stable bimetallic metal-organic frameworks with single-site Ti (IV) incorporation in nodes for efficient photocatalytic oxygen evolution. *CCS Chem.*, **2021**, 3, 2839-2849.
- [15] H. Yang, Y. Wang, R. Krishna, X. Jia, Y. Wang, A. N. Hong, C. Dang, H. E. Castillo, X. Bu, P. Feng, Pore-space-partition-enabled exceptional ethane uptake and ethane-selective ethane-ethylene separation. *J. Am. Chem. Soc.*, **2020**, 142, 2222-2227.
- [16] K. Hong, W. Bak, H. Chun. Unique coordination-based heterometallic approach for the stoichiometric inclusion of high-valent metal ions in a porous metal-organic framework. *Inorg. Chem.*, **2013**, 52, 5645-5647.
- [17] J. Castells-Gil, N. M. Padial, N. Almora-Barrios, J. Albero, A. R. Ruiz Salvador, J. Gonzalez-Platas, H. García, C. Martí-Gastaldo, Chemical engineering of photoactivity in heterometallic



- titanium-organic frameworks by metal doping. *Angew. Chem. Int. Ed.*, **2018**, *57*, 8453-8457.
- [18] G. Lan, K. Ni, S. S. Veroneau, X. Feng, G. T. Nash, T. Luo, Z. Xu, W. Lin, Titanium-based nanoscale metal-organic framework for type I photodynamic therapy. *J. Am. Chem. Soc.*, **2019**, *141*, 4204-4208.
- [19] S. Wang, T. Kitao, N. Guillou, M. Wahiduzzaman, C. Martineau-Corcos, F. Nouar, A. Tissot, L. Binet, N. Ramsahye, S. Devautour-Vinot, S. Kitagawa, S. Seki, Y. Tsutsui, V. Briois, N. Steunou, G. Maurin, T. Uemura, C. Serre, A phase transformable ultrastable titanium-carboxylate framework for photoconduction. *Nat. Commun.*, **2018**, *9*, 1660.
- [20] C. Li, H. Xu, J. Gao, W. Du, L. Shangguan, X. Zhang, R. Lin, H. Wu, W. Zhou, Xin. Liu, J. Yao, B. Chen, Tunable titanium metal-organic frameworks with infinite 1D Ti-O rods for efficient visible-light-driven photocatalytic H<sub>2</sub> evolution. *J. Mater. Chem. A.*, **2019**, *7*, 11928-11933.
- [21] H. L. Nguyen, F. Gándara, H. Furukawa, T. L. H. Doan, K. E. Cordova, O. M. Yaghi, A titanium-organic framework as an exemplar of combining the chemistry of metal- and covalent-organic frameworks. *J. Am. Chem. Soc.*, **2016**, *138*, 4330-4333.
- [22] H. L. Nguyen, T. T. Vu, D. Le, T. L. H. Doan, V. Q. Nguyen, N. T. S. Phan, A titanium-organic framework: engineering of the band-gap energy for photocatalytic property enhancement. *ACS Catal.*, **2017**, *7*, 338-342.
- [23] S. Yuan, T.-F. Liu, D. Feng, J. Tian, K. Wang, J. Qin, Q. Zhang, Y.-P. Chen, M. Bosch, L. Zou, S. J. Teat, S. J. Dalgarno, H.-C. Zhou, A single crystalline porphyrinic titanium metal-organic framework. *Chem. Sci.*, **2015**, *6*, 3926-3930.
- [24] M. Dan-Hardi, C. Serre, T. Frot, L. Rozes, G. Maurin, C. Sanchez, G. Férey, A new photoactive crystalline highly porous titanium (IV) dicarboxylate. *J. Am. Chem. Soc.*, **2009**, *131*, 10857-10859.
- [25] Y. Fu, D. Sun, Y. Chen, R. Huang, Z. Ding, X. Fu, Z. Li An amine-functionalized titanium metal-organic framework photocatalyst with visible-light-induced activity for CO<sub>2</sub> reduction. *Angew. Chem. Int. Ed.*, **2012**, *51*, 3364-3367.
- [26] S. Wang, H. Reinsch, N. Heymans, M. Wahiduzzaman, C. Martineau-Corcos, G. De Weireld, G. Maurin, C. Serre, Toward a rational design of titanium metal-organic frameworks. *Matter*, **2020**, *2*, 440.
- [27] Yuan, J. S. Qin, H. Q. Xu, J. Su, D. Rossi, Y. Chen, L. Zhang, C. Lollar, Q. Wang, H. L. Jiang, D. H. Son, H. Xu, Z. Huang, X. Zou, H. C. Zhou, [Ti<sub>8</sub>Zr<sub>2</sub>O<sub>12</sub>(COO)<sub>16</sub>] cluster: an ideal inorganic building unit for photoactive metal-organic frameworks. *ACS Cent. Sci.*, **2018**, *4*, 105.
- [28] Y. Keum, S. Park, Y.-P. Chen, J. Park, Titanium-carboxylate metal-organic framework based on an unprecedented Ti-oxo chain cluster. *Angew. Chem. Int. Ed.*, **2018**, *57*, 14852-14856.
